# Supplementary material for: Comparative proteomics of paired vocal fold and oral mucosa fibroblasts
Source: PubMed Central journal article supplement — J Proteomics. Author manuscript; Available in PMC 2017 Apr 12. (PMC5389448; doi:10.1016/j.jprot.2017.01.010), 2017-01-15
Supplement: NIHMS72261-supplement-Supplementary_figures.pdf [file NIHMS72261-supplement-Supplementary_figures.pdf]

# Comparative Proteomics of Paired Vocal Fold and Oral Mucosa Fibroblasts

*Michael Karbiener<sup>a,\*</sup>, Barbara Darnhofer<sup>b,c,d</sup>, Marie-Therese Frisch<sup>e</sup>, Beate Rinner<sup>e</sup>,  
Ruth Birner-Gruenberger<sup>b,c,d</sup>, Markus Gugatschka<sup>a</sup>.*

- <sup>a</sup> Department of Phoniatics, ENT University Hospital, Medical University of Graz, Austria
- <sup>b</sup> Research Unit „Functional Proteomics and Metabolic Pathways“, Institute of Pathology, Medical University of Graz, Austria
- <sup>c</sup> Omics Center Graz, BioTechMed-Graz, Austria
- <sup>d</sup> Austrian Centre of Industrial Biotechnology (ACIB), Austria
- <sup>e</sup> Core Facility Alternative Biomodels und Preclinical Imaging, Division of Biomedical Research, Medical University of Graz, Austria

\* Corresponding author at: Department of Phoniatics, ENT University Hospital, Medical University of Graz, Auenbruggerplatz 26, 8036 Graz, Austria. Phone: +43-316-385-30083. E-mail address: michael.karbiener@medunigraz.at.

---

## Supplemental Figures

# Window Display Report

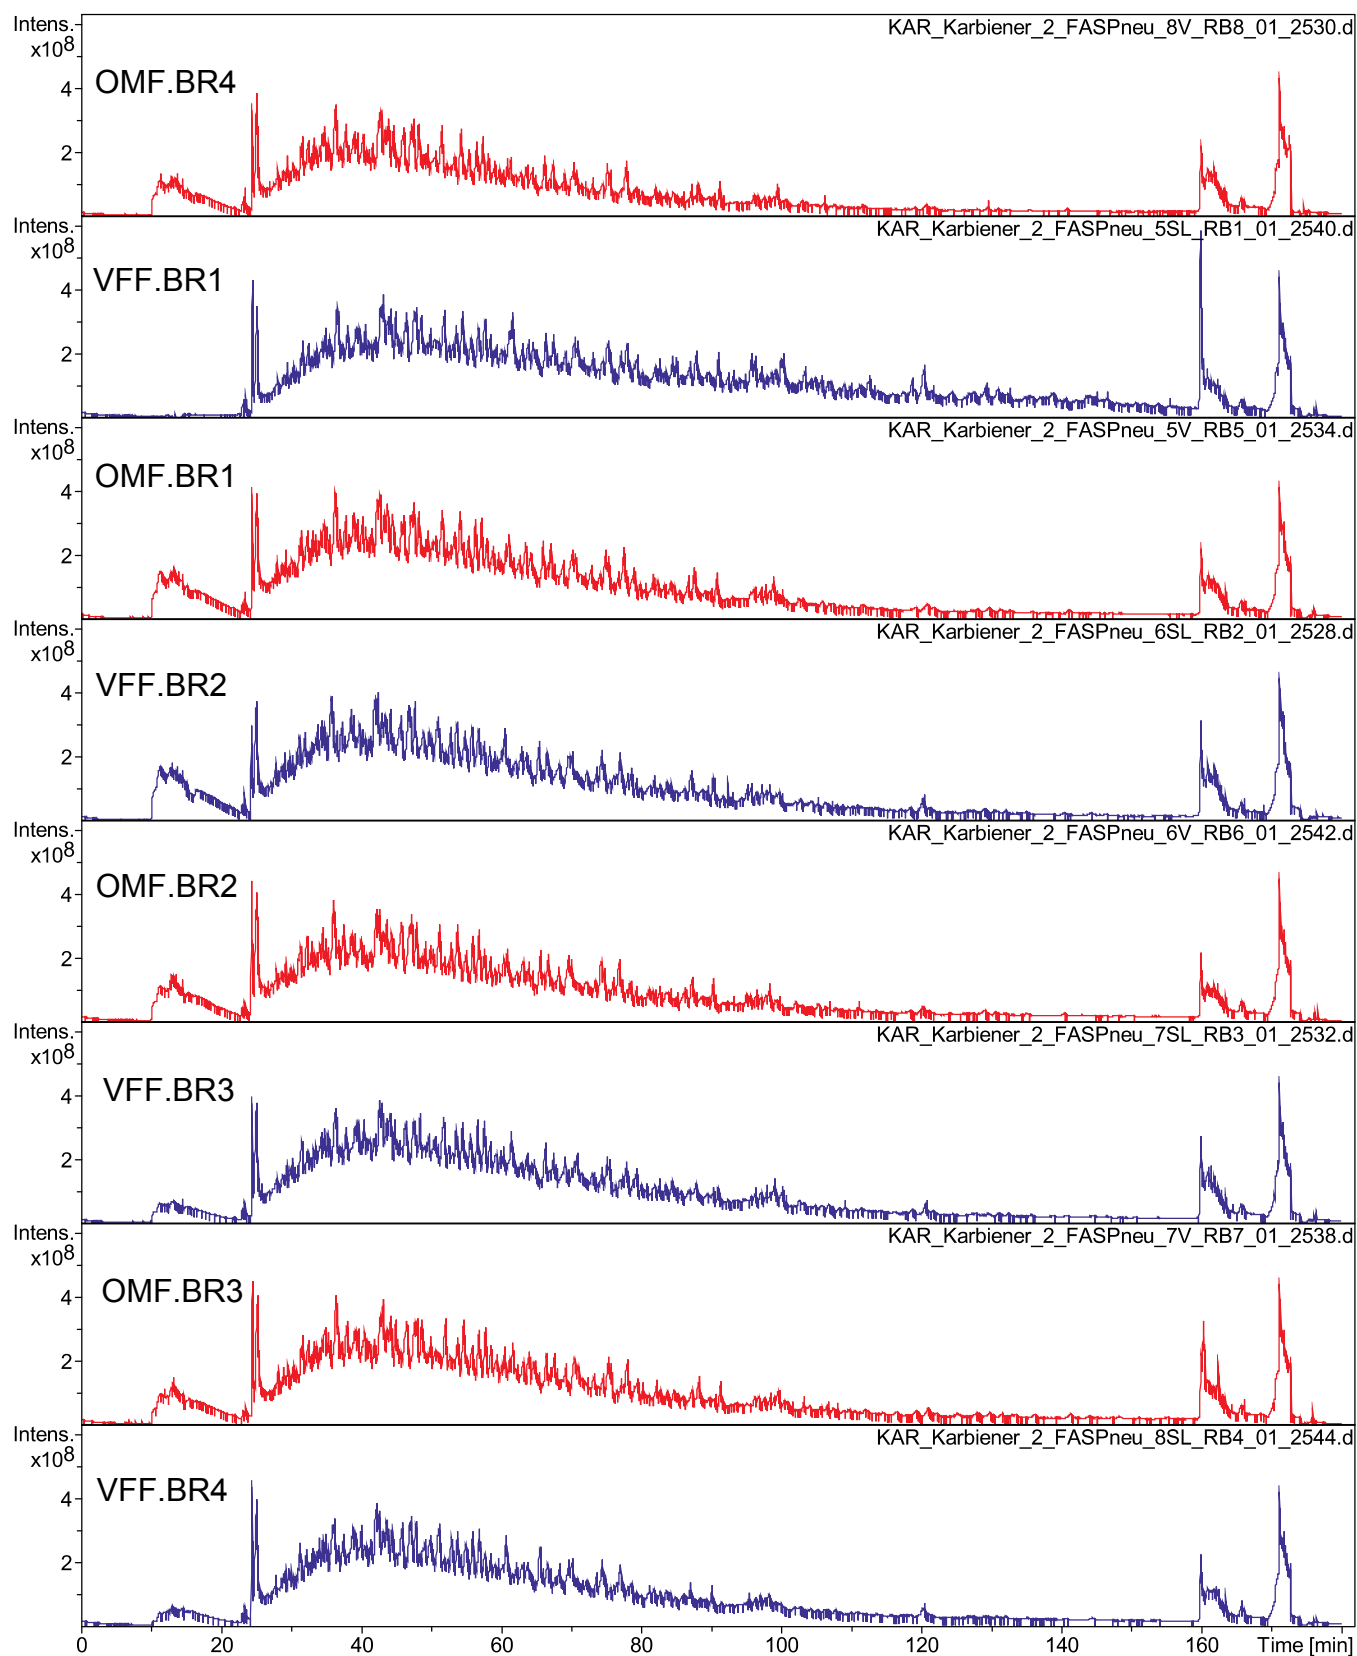

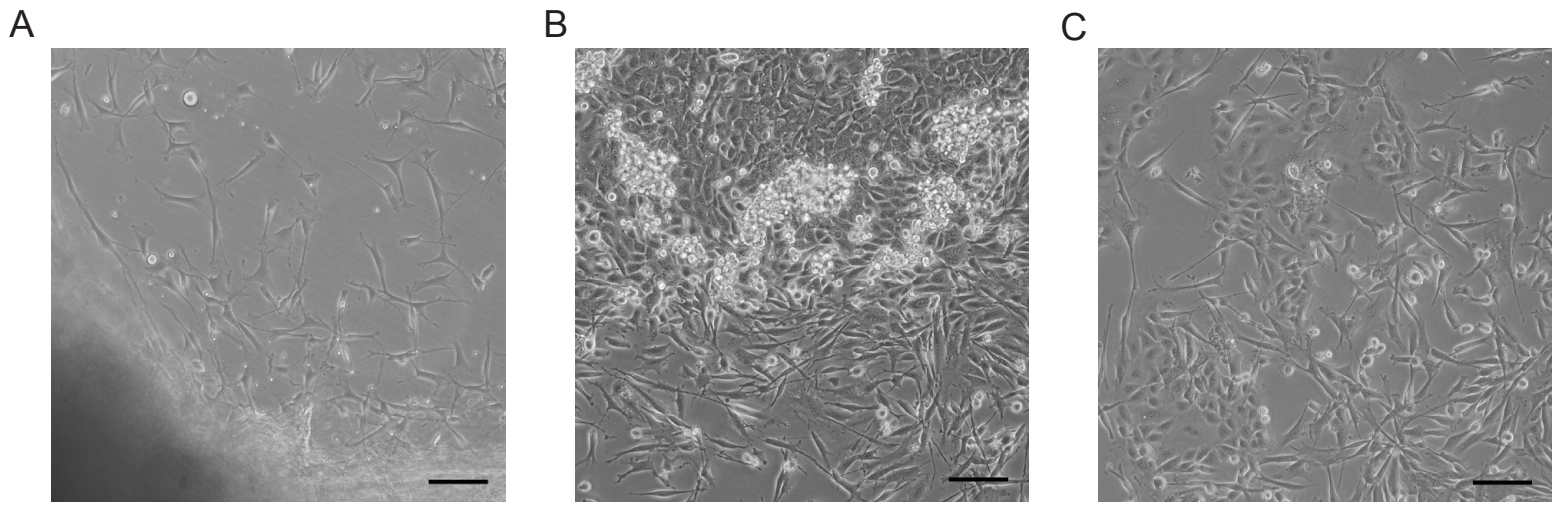

D

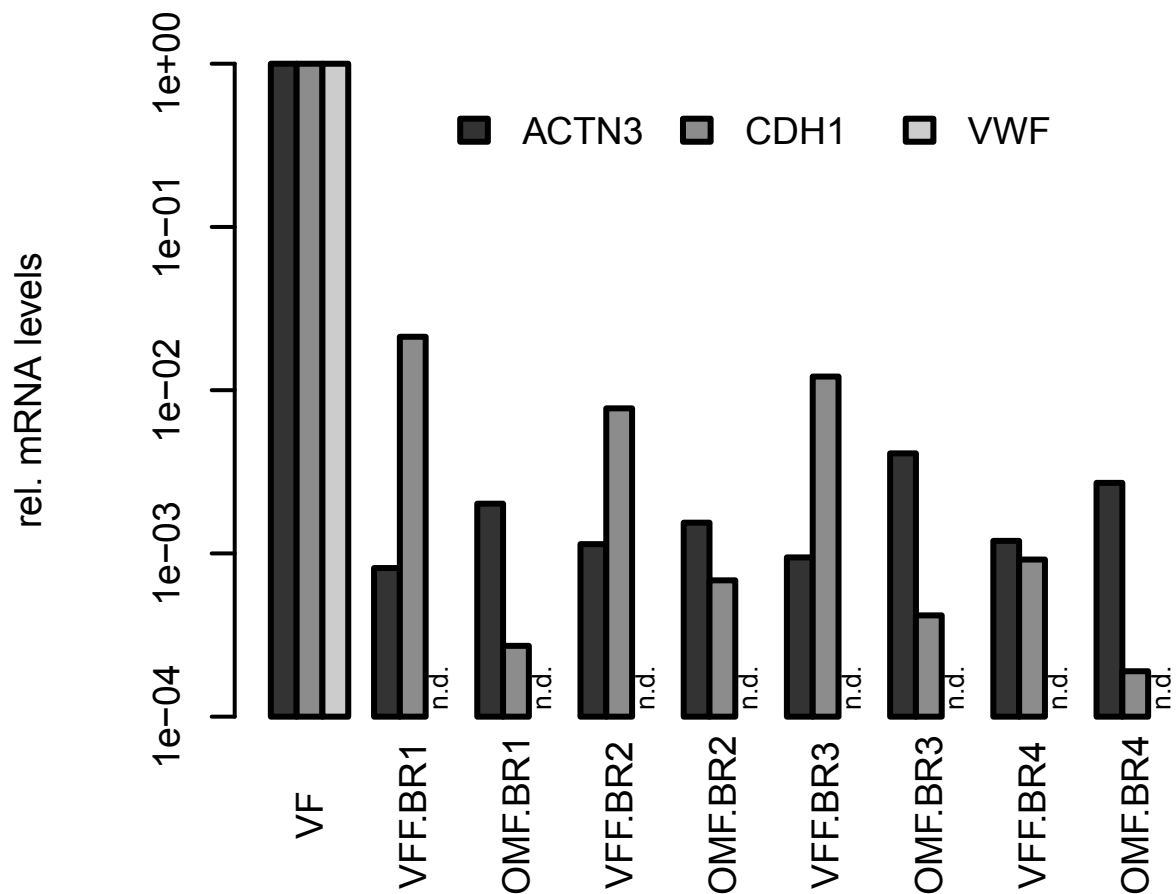

**Supplemental Figure S2.** Establishment of fibroblast populations from vocal fold and oral mucosa.

Tissues were dissected to prepare pieces of approximately 2 mm x 2 mm x 2 mm, which were placed into cell culture plates, overlaid with growth medium and incubated at 37°C and 5%CO<sub>2</sub>. (A) Fibroblastoid cells started to emerge after 2-7 days (representative phase contrast microscopy image). Occasionally, the primary culture also contained mixtures of fibroblasts with cells that had epithelial (B) or endothelial (C) morphology; however, these cell types disappeared after 2-4 passages. (A-C) scale bar: 100 μm. (D) At passages 4-6, fibroblast populations from all 4 biological replicates (BR1–BR4) were analyzed by RT-qPCR for the presence of skeletal muscle (ACTN3), epithelial (CDH1), and endothelial (VWF) markers. Data is presented on a logarithmic scale relative to lysate from a total vocal fold (VF). n.d., not detectable.

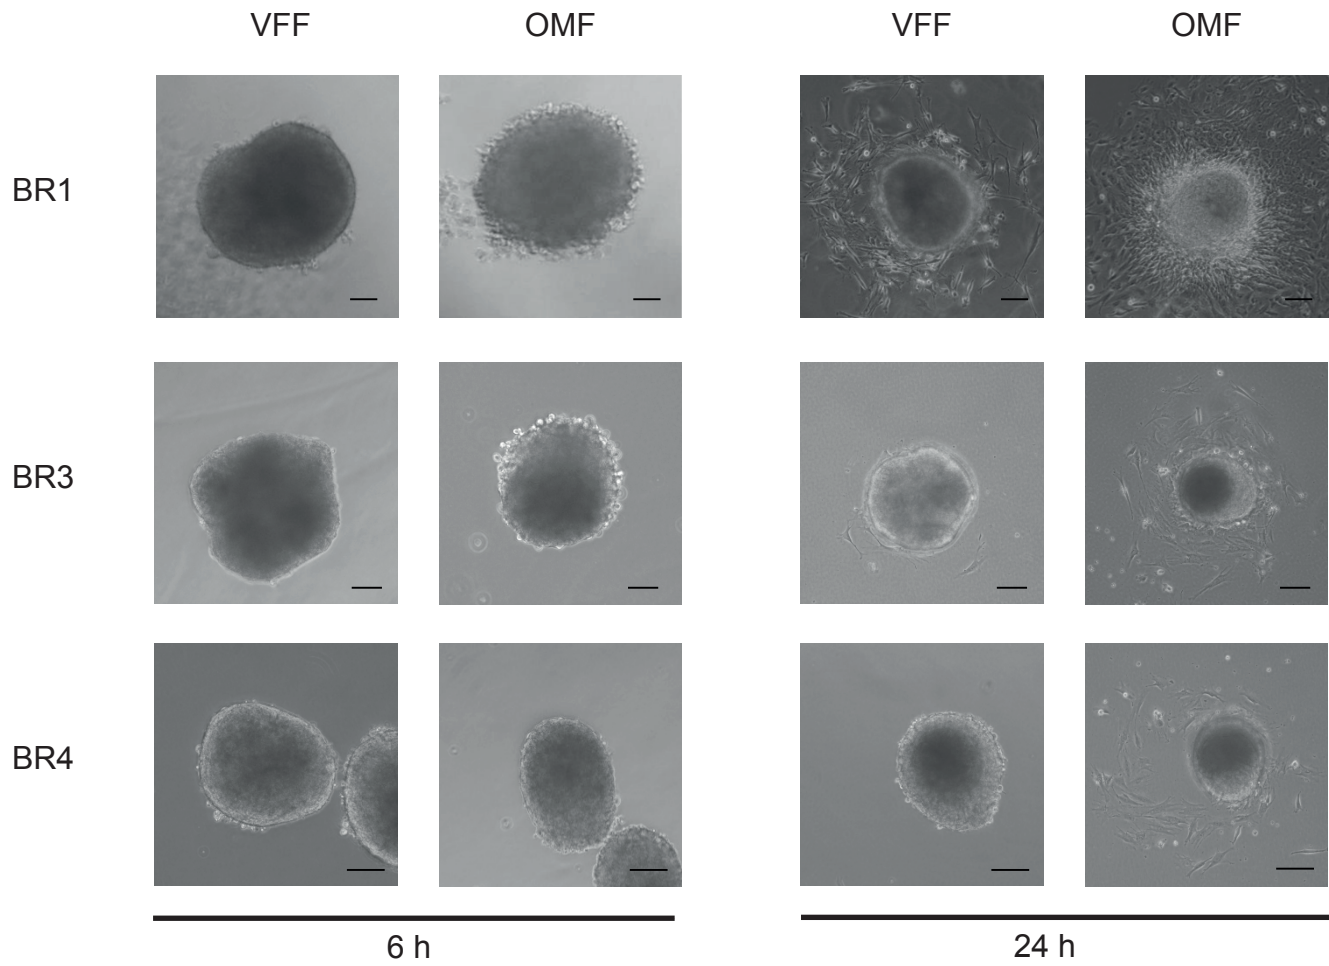

**Supplemental Figure S3.** 3D spheroid culture of paired vocal fold fibroblasts and oral mucosa fibroblasts. Phase contrast microscopy images that were acquired 6 h and 24 h post re-plating are shown for the biological replicates (BR) 1, 3, and 4. Scale bar: 100  $\mu$ m.

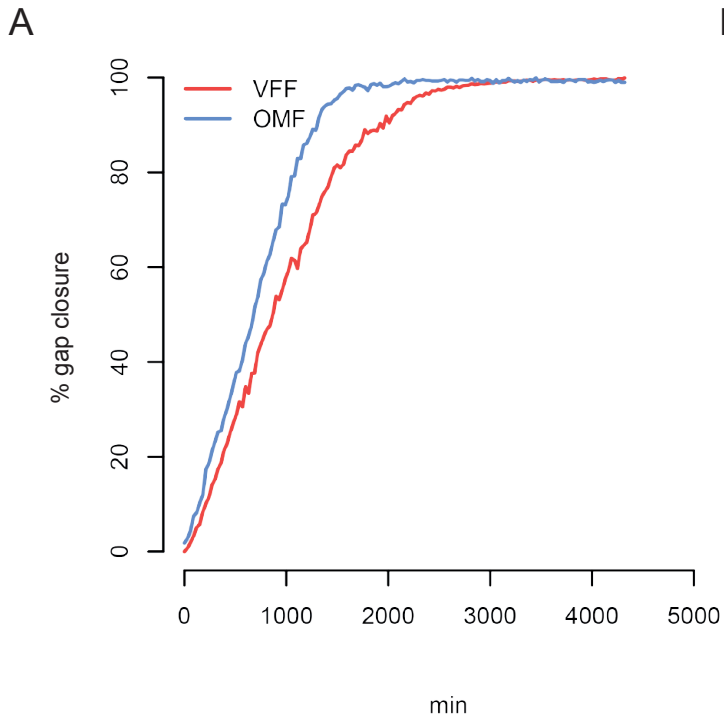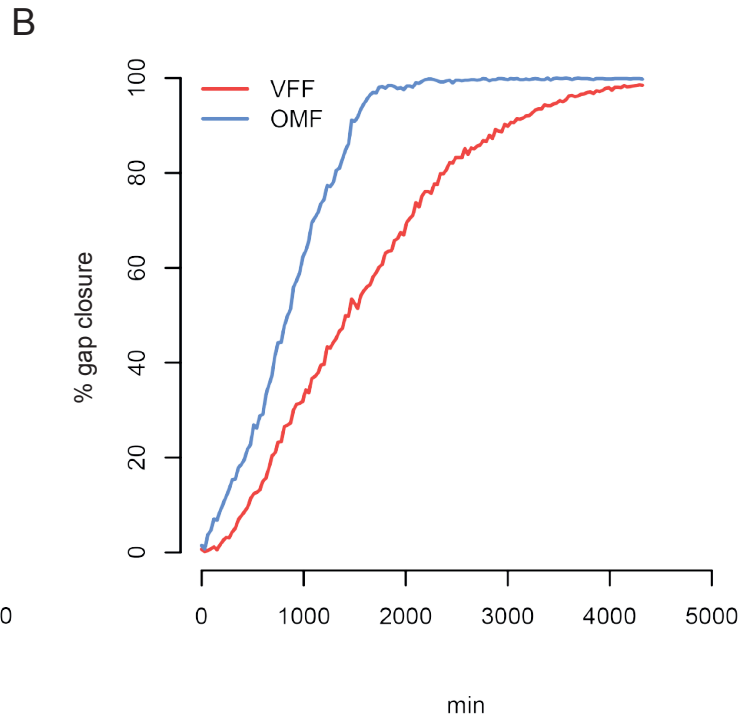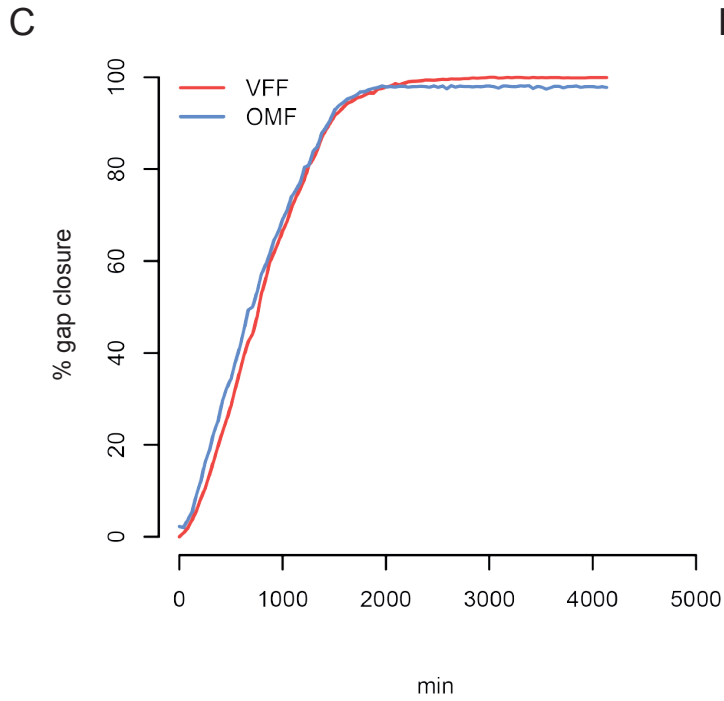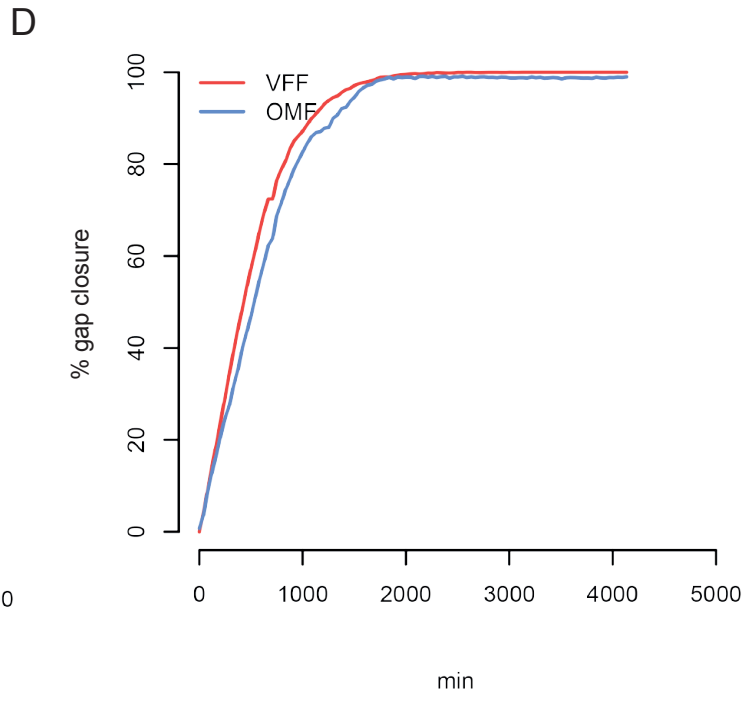

**Supplemental Figure S4.** 2D migration assay. Vocal fold fibroblasts (VFF) and oral mucosa fibroblasts (OMF) were seeded into a 2-well silicone insert (placed in wells of a 24 well plate). Inserts were removed after ~16 h, and cell migration (leading to closure of the 500  $\mu$ m-gap between the two areas of confluent cells) was tracked over 72 h. Wound closure (expressed in % of the initial gap area) was subsequently calculated and is presented for pairs of VFF and OMF. (A) BR1, (B), BR2, (C) BR3, (D) BR4.

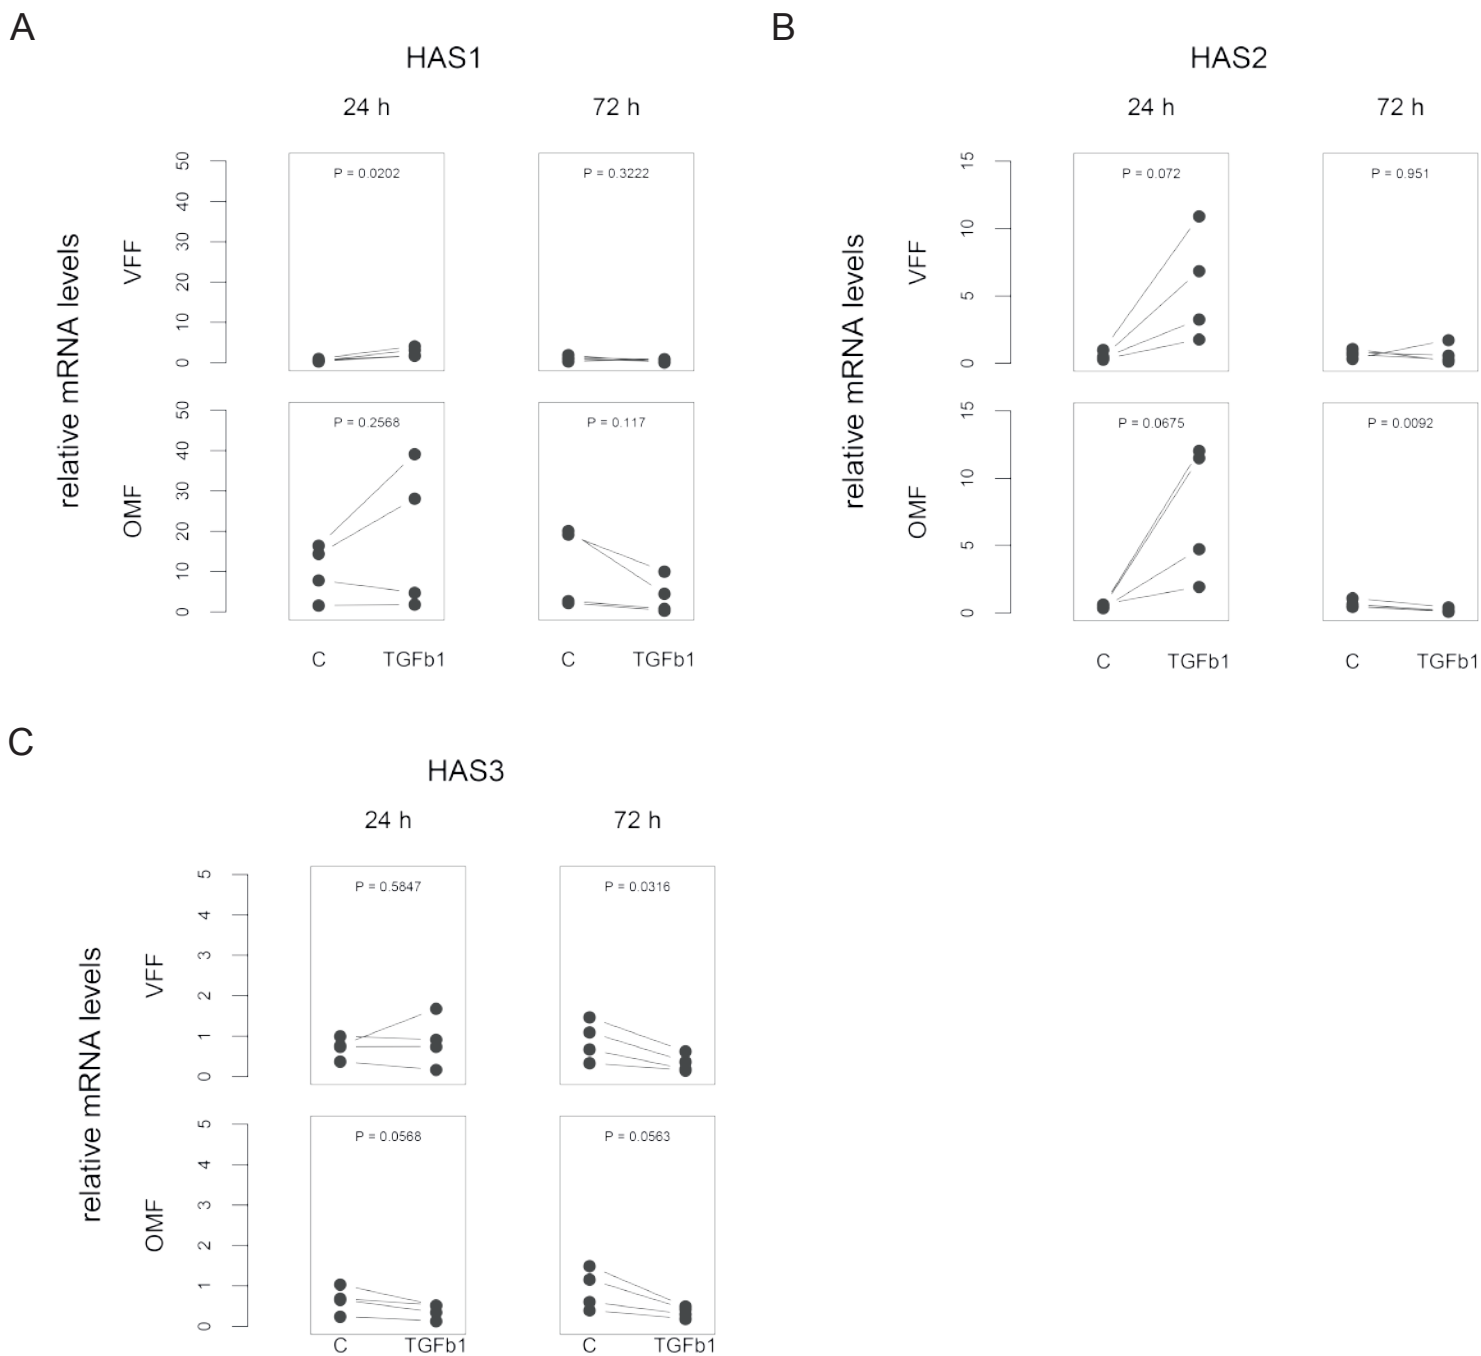

**Supplemental Figure S5.** Cellular response to pro-fibrotic stimulus. Paired VFF and OMF ( $n=4$ ) were exposed to TGF- $\beta$ 1 (5 ng/mL) or vehicle ("C") and expression of hyaluronan synthase 1 (A), hyaluronan synthase 2 (B), and hyaluronan synthase 3 (C) was analyzed 24 h and 72 h later.

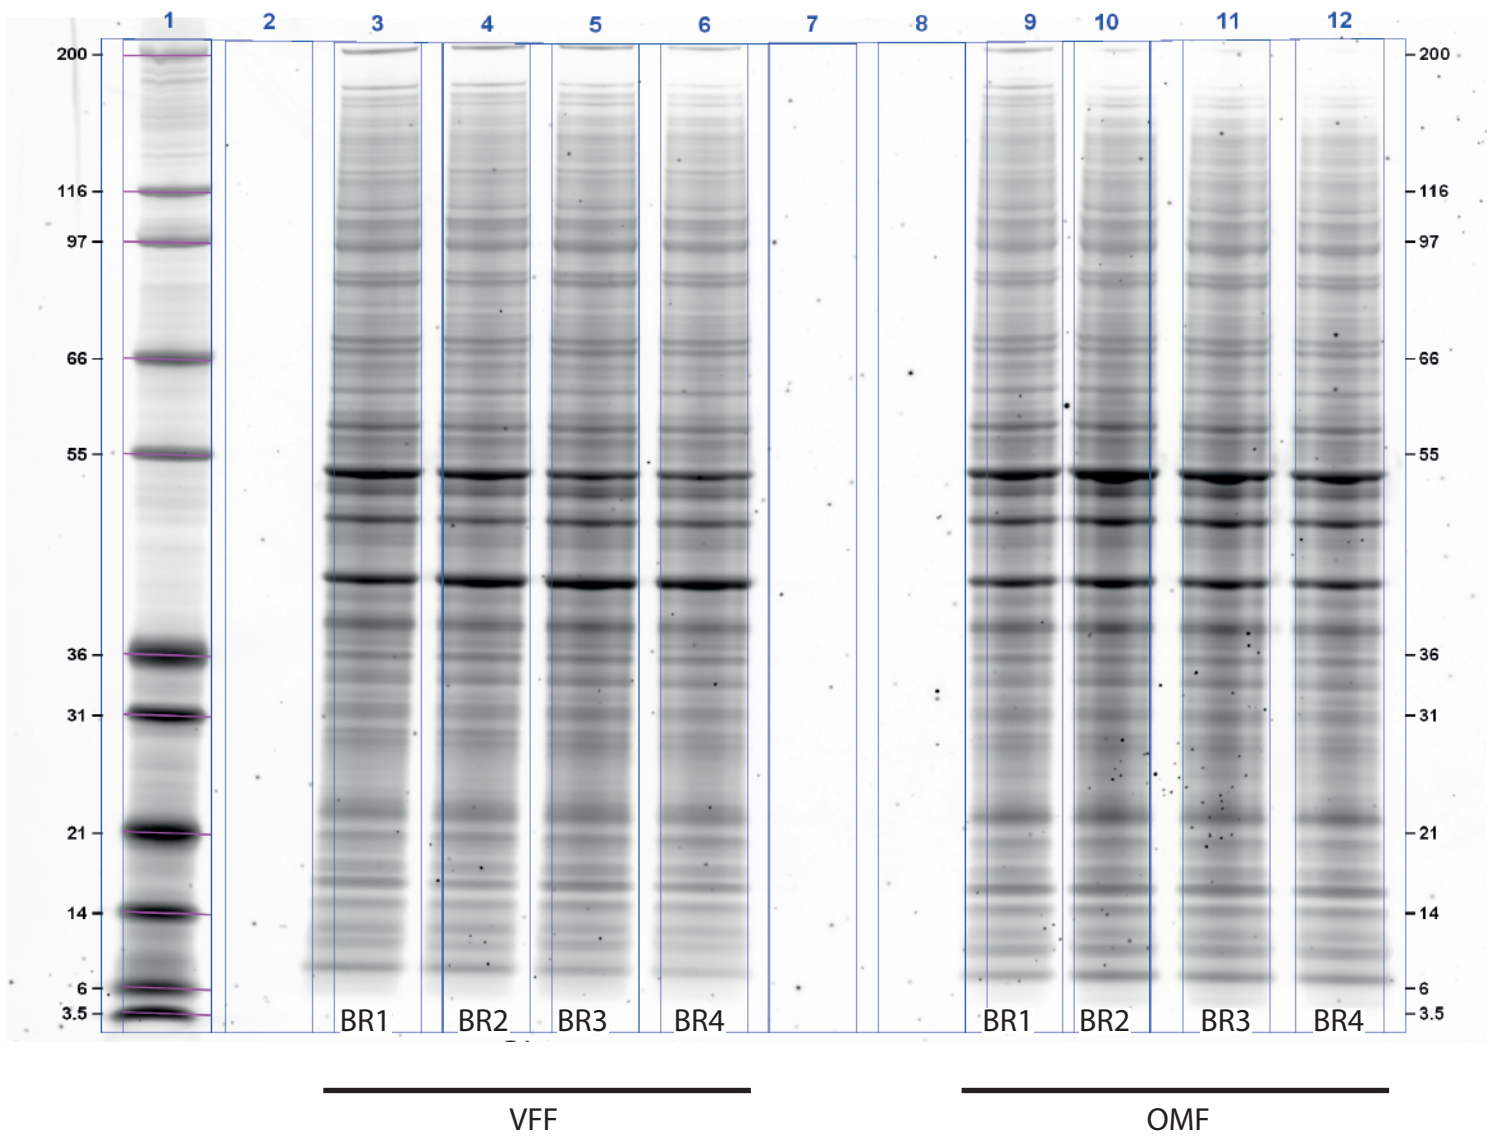

**Supplemental Figure S6.** Qualitative analysis of protein lysates used for LC-MS/MS analysis. Lysates from four biological replicates (BR) of VFF and OMF were subjected to denaturing gel electrophoresis (SDS-PAGE) followed by Krypton Fluorescent Protein Stain.

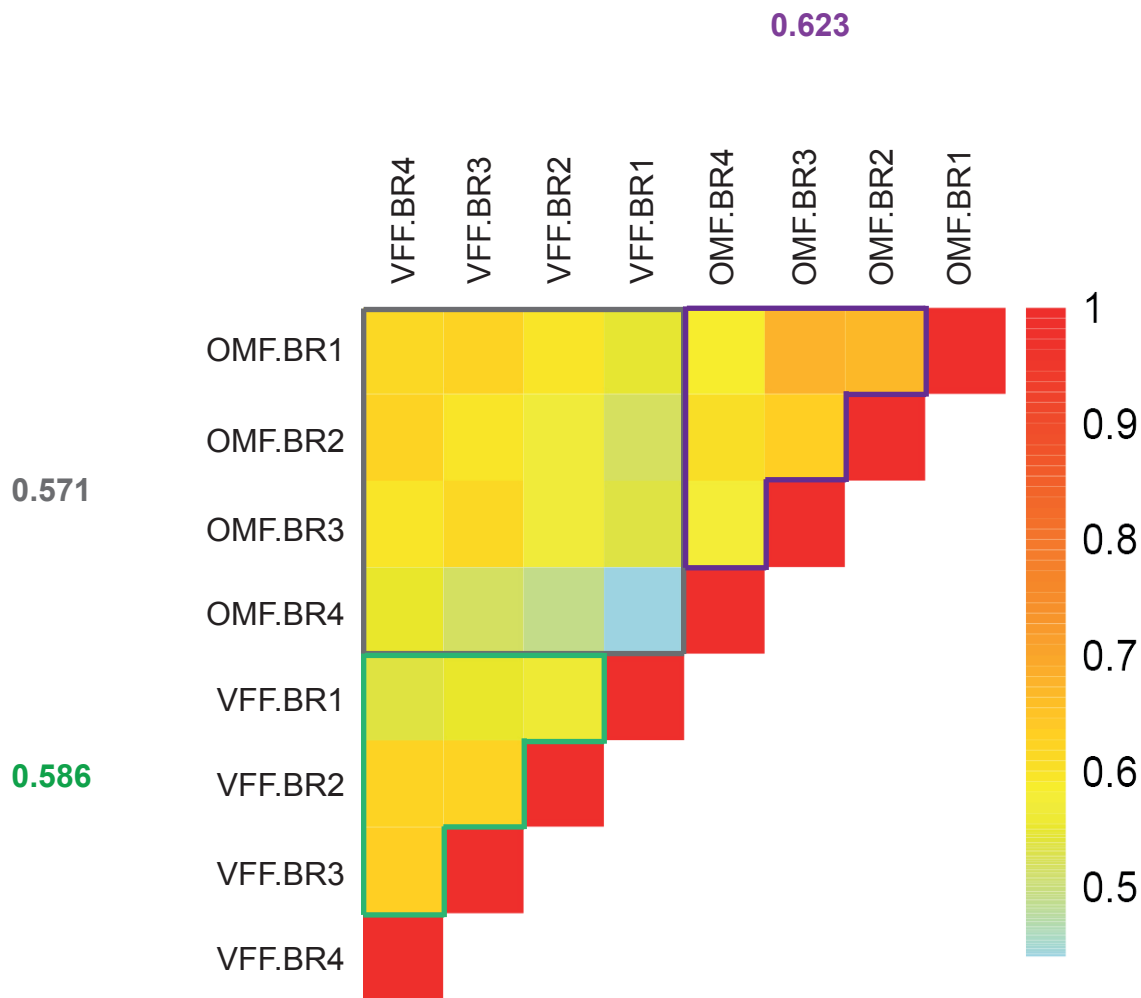

**Supplemental Figure S7.** Pairwise overlaps of proteins detected in VFF and OMF samples. For each possible pair of samples, the overlap index ( $OI = [\text{no. of proteins detected in both samples}] / [\text{no. of proteins detected in both samples} + \text{no. of proteins detected in sample 1 only} + \text{no. of proteins detected in sample 2 only}]$ ) was calculated. Results are summarized as heat map. Average overlap indices within all VFF samples, within all OMF samples, or all possible VFF-OMF combinations are indicated as green, purple, and grey values, respectively.
